# Supplementary material for: Validity testing of the conspiratorial thinking and anti-expert sentiment scales during the COVID-19 pandemic across 24 languages from a large-scale global dataset
Source: PubMed Central journal article supplement (PMC9530382; doi:10.1017/s0950268822001443), 2022-09-12
Supplement: S0950268822001443sup001.pdf [file S0950268822001443sup001.pdf]

## Supplementary Materials

### Supplementary Tables

**Table S1**

*Demographics of participants from language groups where  $n \geq 100$*

|                      | Gender |        |        |                            | Age (years) |       |           |            | Education level         |                           |                          |                          |       |
|----------------------|--------|--------|--------|----------------------------|-------------|-------|-----------|------------|-------------------------|---------------------------|--------------------------|--------------------------|-------|
|                      | N      | Female | Male   | Other/Would rather not say | Mean        | SD    | Doctorate | University | Some university/college | $\geq 12$ years of school | $\geq 9$ years of school | $\geq 6$ years of school | None  |
| Total                | 12,261 | 67.03% | 32.00% | 0.97%                      | 37.10       | 14.56 | 5.96%     | 48.53%     | 25.67%                  | 16.51%                    | 2.26%                    | 0.43%                    | 0.64% |
| Bulgarian            | 253    | 75.10% | 24.51% | 0.40%                      | 40.80       | 16.38 | 5.56%     | 47.62%     | 34.13%                  | 12.30%                    | 0.00%                    | 0.00%                    | 0.40% |
| Czech                | 304    | 70.72% | 27.63% | 1.64%                      | 33.52       | 11.32 | 4.93%     | 48.68%     | 30.92%                  | 15.13%                    | 0.00%                    | 0.33%                    | 0.00% |
| German               | 620    | 64.84% | 34.68% | 0.48%                      | 44.29       | 18.53 | 6.94%     | 47.74%     | 18.06%                  | 23.23%                    | 3.39%                    | 0.16%                    | 0.48% |
| English              | 1,246  | 66.35% | 32.45% | 1.20%                      | 30.88       | 11.49 | 10.03%    | 52.81%     | 34.11%                  | 2.65%                     | 0.40%                    | 0.00%                    | 0.00% |
| Spanish (Colombia)   | 470    | 66.60% | 32.98% | 0.43%                      | 40.06       | 12.27 | 6.61%     | 76.33%     | 12.79%                  | 2.99%                     | 0.85%                    | 0.21%                    | 0.21% |
| Spanish (Costa Rica) | 191    | 71.20% | 27.23% | 1.57%                      | 36.54       | 10.91 | 1.05%     | 83.77%     | 10.99%                  | 2.62%                     | 1.05%                    | 0.52%                    | 0.00% |

Spanish

(Ecuador) 218 66.97% 31.65% 1.38% 33.14 11.23 3.67% 72.94% 19.27% 2.75% 0.00% 0.92% 0.46%

Spanish

(Spain) 587 67.58% 31.91% 0.51% 40.63 13.54 17.72% 57.92% 21.12% 2.56% 0.68% 0.00% 0.00%

Spanish

(Guatemala) 181 84.53% 15.47% 0.00% 36.67 14.89 3.31% 64.09% 29.28% 2.76% 0.00% 0.55% 0.00%

Spanish

(Uruguay) 220 86.36% 13.64% 0.00% 42.65 13.00 6.82% 74.09% 11.36% 5.91% 1.36% 0.00% 0.45%

Spanish

(Honduras) 314 66.56% 32.17% 1.27% 25.31 8.24 0.64% 18.47% 64.01% 14.97% 0.64% 0.64% 0.64%

Estonian 219 86.70% 13.30% 0.00% 39.32 10.50 1.38% 56.42% 22.02% 19.27% 0.92% 0.00% 0.00%

Finnish 847 79.57% 19.13% 1.30% 46.32 14.38 4.15% 54.92% 19.10% 16.96% 2.61% 1.66% 0.59%

Italian 279 73.02% 26.62% 0.36% 45.23 16.07 7.27% 47.64% 22.55% 20.36% 1.82% 0.36% 0.00%

Japanese 2,017 41.35% 57.36% 1.29% 45.53 11.10 0.99% 32.24% 20.29% 36.71% 6.25% 0.84% 2.68%

Norwegian 328 82.93% 16.77% 0.30% 40.48 13.34 7.65% 61.77% 18.35% 10.09% 0.61% 0.92% 0.61%

Portuguese

(Portugal) 387 71.83% 26.87% 1.29% 33.13 14.63 24.55% 42.12% 20.93% 11.37% 1.03% 0.00% 0.00%

Portuguese

(Brazil) 411 72.02% 27.49% 0.49% 37.92 13.17 13.63% 66.42% 16.06% 3.89% 0.00% 0.00% 0.00%

Russian 2,172 71.65% 27.34% 1.01% 27.42 11.57 1.34% 32.90% 41.38% 20.55% 3.23% 0.37% 0.23%

|           |     |        |        |       |       |       |        |        |        |        |       |       |       |
|-----------|-----|--------|--------|-------|-------|-------|--------|--------|--------|--------|-------|-------|-------|
| Slovak    | 272 | 88.97% | 11.03% | 0.00% | 35.17 | 13.30 | 8.55%  | 51.30% | 26.39% | 12.27% | 0.37% | 0.37% | 0.74% |
| Swedish   | 139 | 81.29% | 15.11% | 3.60% | 42.12 | 14.88 | 8.70%  | 55.80% | 23.19% | 9.42%  | 2.90% | 0.00% | 0.00% |
| Turkish   | 146 | 68.49% | 30.82% | 0.68% | 23.73 | 7.47  | 4.11%  | 38.36% | 2.05%  | 55.48% | 0.00% | 0.00% | 0.00% |
| Ukrainian | 208 | 64.42% | 35.10% | 0.48% | 32.38 | 10.31 | 12.02% | 82.21% | 1.44%  | 3.85%  | 0.00% | 0.00% | 0.48% |
| Chinese   | 232 | 64.22% | 33.62% | 2.16% | 35.16 | 9.83  | 6.90%  | 87.93% | 2.16%  | 3.02%  | 0.00% | 0.00% | 0.00% |

---

**Table S2***Significant unique factor loading parameters reported in the Conspiratorial Thinking Scale*

|                       | CTS Item 1  | CTS Item 2 | CTS Item 3  | CTS Item 4  |
|-----------------------|-------------|------------|-------------|-------------|
| Bulgarian             |             |            | <b>-.52</b> |             |
| Czech                 |             |            |             |             |
| German                |             |            |             |             |
| English               |             |            |             |             |
| Spanish (Colombia)    |             |            |             |             |
| Spanish (Costa Rica)  |             |            |             |             |
| Spanish (Ecuador)     |             |            |             |             |
| Spanish (Spain)       |             |            |             |             |
| Spanish (Guatemala)   |             |            |             |             |
| Spanish (Uruguay)     |             |            |             |             |
| Spanish (Honduras)    |             |            |             |             |
| Estonian              |             |            |             |             |
| Finnish               |             |            |             |             |
| Italian               |             |            |             |             |
| Japanese              |             |            |             |             |
| Norwegian             |             |            |             |             |
| Portuguese (Portugal) |             |            |             |             |
| Portuguese (Brazil)   |             |            |             | <b>.77</b>  |
| Russian               |             |            |             |             |
| Slovak                | <b>-.66</b> |            |             | <b>-.77</b> |
| Swedish               |             |            |             |             |
| Turkish               |             |            | <b>-.67</b> |             |
| Ukrainian             |             |            |             |             |
| Chinese               | <b>-.61</b> |            |             |             |

*Note.* Values demonstrate the difference between the overall factor loading and group-specific factor loading in each item. Only the values from groups/items reported significant unique parameters were included in the table.

**Table S3***Significant unique intercept parameters reported in the Conspiratorial Thinking Scale*

|                       | CTS Item 1  | CTS Item 2  | CTS Item 3  | CTS Item 4   |
|-----------------------|-------------|-------------|-------------|--------------|
| Bulgarian             | <b>.83</b>  | <b>-.50</b> |             | <b>.67</b>   |
| Czech                 |             |             |             |              |
| German                |             |             | <b>-.52</b> |              |
| English               |             |             | <b>-.61</b> |              |
| Spanish (Colombia)    | <b>-.59</b> |             |             |              |
| Spanish (Costa Rica)  |             |             |             |              |
| Spanish (Ecuador)     |             |             |             |              |
| Spanish (Spain)       | <b>-.59</b> |             |             |              |
| Spanish (Guatemala)   |             |             |             |              |
| Spanish (Uruguay)     | <b>.85</b>  |             |             |              |
| Spanish (Honduras)    |             |             |             |              |
| Estonian              | <b>.59</b>  |             |             |              |
| Finnish               |             |             |             | <b>.73</b>   |
| Italian               |             |             |             |              |
| Japanese              | <b>.68</b>  |             |             |              |
| Norwegian             |             | <b>.67</b>  | <b>-.75</b> |              |
| Portuguese (Portugal) |             |             |             |              |
| Portuguese (Brazil)   | <b>-.89</b> |             |             |              |
| Russian               | <b>.83</b>  |             |             |              |
| Slovak                |             |             |             |              |
| Swedish               | <b>-.82</b> | <b>.58</b>  |             | <b>-1.47</b> |
| Turkish               |             |             |             |              |
| Ukrainian             | <b>.87</b>  |             |             |              |
| Chinese               |             |             |             |              |

*Note.* Values demonstrate the difference between the overall intercept and group-specific intercept in each item. Only the values from groups/items reported significant unique parameters were included in the table.

**Table S4***Significant unique factor loading parameters reported in the Anti-Expert Sentiment Scale*

|                       | AESS Item 1 | AESS Item 2 | AESS Item 3 |
|-----------------------|-------------|-------------|-------------|
| Bulgarian             |             |             |             |
| Czech                 |             |             |             |
| German                |             |             |             |
| English               |             |             |             |
| Spanish (Colombia)    |             |             |             |
| Spanish (Costa Rica)  | .77         |             |             |
| Spanish (Ecuador)     |             |             |             |
| Spanish (Spain)       |             |             |             |
| Spanish (Guatemala)   |             |             |             |
| Spanish (Uruguay)     |             |             |             |
| Spanish (Honduras)    |             |             |             |
| Estonian              |             |             |             |
| Finnish               |             |             |             |
| Italian               |             |             |             |
| Japanese              |             |             |             |
| Norwegian             |             |             |             |
| Portuguese (Portugal) |             | .60         |             |
| Portuguese (Brazil)   |             |             |             |
| Russian               |             |             |             |
| Slovak                |             |             |             |
| Swedish               |             |             |             |
| Turkish               |             |             |             |
| Ukrainian             | -.79        |             | -.76        |
| Chinese               |             | 1.38        |             |

*Note.* Values demonstrate the difference between the overall factor loading and group-specific factor loading in each item. Only the values from groups/items reported significant unique parameters were included in the table.

**Table S5***Significant unique intercept parameters reported in the Anti-Expert Sentiment Scale*

|                       | AESS Item 1 | AESS Item 2 | AESS Item 3 |
|-----------------------|-------------|-------------|-------------|
| Bulgarian             |             |             |             |
| Czech                 |             |             | <b>.54</b>  |
| German                |             |             |             |
| English               |             |             |             |
| Spanish (Colombia)    |             |             |             |
| Spanish (Costa Rica)  |             | <b>-.88</b> | <b>-.56</b> |
| Spanish (Ecuador)     |             |             |             |
| Spanish (Spain)       |             |             |             |
| Spanish (Guatemala)   |             | <b>-.26</b> |             |
| Spanish (Uruguay)     |             |             |             |
| Spanish (Honduras)    |             |             |             |
| Estonian              |             |             | <b>-.56</b> |
| Finnish               |             | <b>.56</b>  |             |
| Italian               |             |             |             |
| Japanese              |             |             | <b>.72</b>  |
| Norwegian             |             |             |             |
| Portuguese (Portugal) | <b>.54</b>  |             |             |
| Portuguese (Brazil)   |             |             | <b>-.60</b> |
| Russian               |             |             |             |
| Slovak                |             |             |             |
| Swedish               |             |             | <b>.90</b>  |
| Turkish               | <b>.57</b>  |             | <b>-.76</b> |
| Ukrainian             | <b>-.51</b> | <b>1.58</b> |             |
| Chinese               |             |             |             |

*Note.* Values demonstrate the difference between the overall intercept and group-specific intercept in each item. Only the values from groups/items reported significant unique parameters were included in the table.

**Table S6***Factor loadings estimated by multigroup CFA*

|                       | CTS Item 1 | CTS Item 2 | CTS Item 3 | CTS Item 4 | AESS Item 1 | AESS Item 2 | AESS Item 3 |
|-----------------------|------------|------------|------------|------------|-------------|-------------|-------------|
| Bulgarian             | 1.62       | 1.36       | 1.07       | 1.63       | 1.38        | 1.19        | 1.20        |
| Czech                 | 1.27       | 1.00       | 1.10       | 1.48       | 1.14        | .85         | .90         |
| German                | .90        | .97        | 1.26       | 1.16       | 1.01        | 1.00        | .83         |
| English               | 1.39       | .96        | 1.39       | 1.70       | 1.14        | 1.46        | .81         |
| Spanish (Colombia)    | 1.06       | 1.02       | 1.30       | 1.49       | 1.14        | .72         | .66         |
| Spanish (Costa Rica)  | 1.18       | 1.07       | 1.27       | 1.59       | 1.31        | .45         | .63         |
| Spanish (Ecuador)     | 1.15       | 1.21       | 1.33       | 1.34       | .92         | .82         | .73         |
| Spanish (Spain)       | .93        | 1.09       | 1.46       | 1.27       | 1.14        | .98         | .69         |
| Spanish (Guatemala)   | 1.17       | .84        | .86        | 1.49       | .90         | .42         | .69         |
| Spanish (Uruguay)     | 1.38       | 1.23       | 1.37       | 1.20       | .62         | .73         | .70         |
| Spanish (Honduras)    | 1.13       | .97        | .97        | 1.29       | .66         | 1.26        | .92         |
| Estonian              | 1.06       | 1.37       | 1.33       | 1.05       | 1.10        | .73         | .52         |
| Finnish               | .93        | 1.51       | 1.54       | 1.38       | 1.11        | .92         | .77         |
| Italian               | 1.06       | 1.25       | 1.58       | 1.47       | .94         | 1.37        | 1.08        |
| Japanese              | 1.14       | 1.25       | 1.22       | 1.21       | .70         | 1.01        | .69         |
| Norwegian             | 1.04       | 1.16       | 1.24       | 1.11       | .85         | .91         | .87         |
| Portuguese (Portugal) | .85        | 1.07       | 1.26       | 1.18       | .74         | 1.17        | .63         |
| Portuguese (Brazil)   | .73        | .69        | .93        | 1.40       | .90         | .70         | .62         |
| Russian               | 1.27       | 1.21       | 1.31       | 1.32       | .62         | 1.15        | 1.02        |
| Slovak                | 1.30       | 1.24       | 1.41       | 1.33       | .83         | .85         | .92         |
| Swedish               | .56        | 1.51       | 1.46       | .55        | .94         | .86         | .97         |
| Turkish               | 1.42       | 1.17       | .77        | 1.64       | .91         | 1.21        | .89         |
| Ukrainian             | 1.27       | 1.38       | 1.44       | 1.34       | .40         | 2.28        | .18         |
| Chinese               | .64        | 1.42       | 1.54       | 1.34       | .57         | 1.41        | .50         |

**Table S7***Intercepts estimated by multigroup CFA*

|                       | CTS Item 1 | CTS Item 2 | CTS Item 3 | CTS Item 4 | AESS Item 1 | AESS Item 2 | AESS Item 3 |
|-----------------------|------------|------------|------------|------------|-------------|-------------|-------------|
| Bulgarian             | 4.00       | 4.81       | 4.78       | 4.50       | 4.52        | 3.12        | 3.41        |
| Czech                 | 2.21       | 4.59       | 4.43       | 2.80       | 3.36        | 2.35        | 2.62        |
| German                | 1.75       | 4.10       | 2.56       | 1.91       | 2.90        | 2.18        | 2.21        |
| English               | 2.66       | 5.00       | 3.87       | 3.22       | 3.33        | 2.54        | 2.21        |
| Spanish (Colombia)    | 2.31       | 5.15       | 4.71       | 3.43       | 3.04        | 2.01        | 1.77        |
| Spanish (Costa Rica)  | 3.00       | 5.43       | 5.13       | 4.01       | 3.19        | 1.81        | 1.80        |
| Spanish (Ecuador)     | 2.75       | 4.84       | 4.39       | 3.60       | 3.16        | 2.16        | 2.08        |
| Spanish (Spain)       | 2.25       | 5.15       | 4.52       | 2.96       | 3.06        | 2.10        | 2.21        |
| Spanish (Guatemala)   | 2.77       | 5.29       | 5.19       | 3.79       | 3.53        | 2.10        | 2.02        |
| Spanish (Uruguay)     | 2.67       | 4.43       | 3.44       | 2.66       | 3.16        | 1.69        | 1.71        |
| Spanish (Honduras)    | 3.64       | 5.39       | 5.12       | 4.59       | 4.01        | 2.64        | 2.56        |
| Estonian              | 1.92       | 2.69       | 2.64       | 1.97       | 3.05        | 2.11        | 1.83        |
| Finnish               | 1.62       | 3.08       | 2.70       | 2.24       | 2.46        | 2.32        | 1.73        |
| Italian               | 1.95       | 4.53       | 3.96       | 2.83       | 3.87        | 2.36        | 2.48        |
| Japanese              | 3.49       | 4.59       | 4.57       | 3.73       | 3.75        | 2.53        | 3.34        |
| Norwegian             | 1.82       | 4.04       | 2.14       | 1.78       | 2.39        | 1.71        | 1.91        |
| Portuguese (Portugal) | 1.93       | 4.42       | 3.26       | 2.26       | 4.31        | 2.17        | 2.10        |
| Portuguese (Brazil)   | 1.83       | 5.30       | 4.72       | 2.59       | 2.79        | 1.93        | 1.55        |
| Russian               | 3.82       | 4.84       | 4.41       | 4.00       | 4.66        | 3.38        | 3.64        |
| Slovak                | 2.29       | 4.38       | 4.02       | 2.85       | 3.16        | 2.15        | 2.10        |
| Swedish               | 1.40       | 3.35       | 2.70       | 1.43       | 2.08        | 1.50        | 1.74        |
| Turkish               | 3.41       | 5.29       | 5.10       | 4.07       | 4.67        | 2.95        | 2.07        |
| Ukrainian             | 2.01       | 3.00       | 2.82       | 1.92       | 3.24        | 2.01        | 2.79        |
| Chinese               | 2.17       | 4.04       | 3.84       | 3.13       | 4.28        | 3.34        | 3.11        |

**Table S8***Factor loadings after measurement alignment*

|                       | CTS Item 1 | CTS Item 2 | CTS Item 3 | CTS Item 4 | AESS Item 1 | AESS Item 2 | AESS Item 3 |
|-----------------------|------------|------------|------------|------------|-------------|-------------|-------------|
| Bulgarian             | 1.26       | 1.06       | .83        | 1.28       | .96         | .82         | .83         |
| Czech                 | 1.27       | .99        | 1.09       | 1.47       | 1.06        | .79         | .83         |
| German                | .97        | 1.05       | 1.36       | 1.26       | 1.01        | .99         | .83         |
| English               | 1.35       | .93        | 1.35       | 1.65       | .95         | 1.21        | .67         |
| Spanish (Colombia)    | 1.11       | 1.06       | 1.35       | 1.56       | 1.43        | .90         | .83         |
| Spanish (Costa Rica)  | 1.26       | 1.13       | 1.35       | 1.69       | 1.72        | .59         | .83         |
| Spanish (Ecuador)     | 1.16       | 1.23       | 1.35       | 1.37       | 1.05        | .93         | .83         |
| Spanish (Spain)       | .87        | 1.01       | 1.36       | 1.17       | 1.08        | .93         | .65         |
| Spanish (Guatemala)   | 1.27       | .90        | .93        | 1.61       | 1.08        | .51         | .83         |
| Spanish (Uruguay)     | 1.36       | 1.22       | 1.35       | 1.19       | .73         | .86         | .83         |
| Spanish (Honduras)    | 1.26       | 1.08       | 1.08       | 1.44       | .60         | 1.13        | .83         |
| Estonian              | 1.08       | 1.39       | 1.35       | 1.06       | 1.41        | .93         | .67         |
| Finnish               | .82        | 1.33       | 1.35       | 1.21       | 1.20        | .99         | .83         |
| Italian               | .91        | 1.07       | 1.36       | 1.26       | .72         | 1.05        | .83         |
| Japanese              | 1.27       | 1.39       | 1.35       | 1.35       | .84         | 1.21        | .83         |
| Norwegian             | 1.13       | 1.26       | 1.35       | 1.21       | .81         | .87         | .83         |
| Portuguese (Portugal) | .92        | 1.15       | 1.35       | 1.27       | .97         | 1.53        | .83         |
| Portuguese (Brazil)   | 1.07       | 1.00       | 1.36       | 2.05       | 1.19        | .93         | .83         |
| Russian               | 1.31       | 1.25       | 1.35       | 1.36       | .50         | .93         | .83         |
| Slovak                | 1.25       | 1.19       | 1.35       | 1.28       | .76         | .77         | .83         |
| Swedish               | .52        | 1.40       | 1.35       | .51        | .81         | .74         | .83         |
| Turkish               | 1.27       | 1.04       | .69        | 1.46       | .85         | 1.13        | .83         |
| Ukrainian             | 1.20       | 1.30       | 1.35       | 1.26       | .16         | .93         | .07         |
| Chinese               | .57        | 1.25       | 1.36       | 1.18       | .94         | 2.31        | .83         |

**Table S9***Intercepts after measurement alignment*

|                       | CTS Item 1 | CTS Item 2 | CTS Item 3 | CTS Item 4 | AESS Item 1 | AESS Item 2 | AESS Item 3 |
|-----------------------|------------|------------|------------|------------|-------------|-------------|-------------|
| Bulgarian             | 4.00       | 4.81       | 4.78       | 4.50       | 4.52        | 3.12        | 3.41        |
| Czech                 | 3.09       | 5.28       | 5.19       | 3.82       | 4.46        | 3.17        | 3.49        |
| German                | 3.11       | 5.57       | 4.46       | 3.67       | 3.85        | 3.11        | 2.99        |
| English               | 3.16       | 5.35       | 4.37       | 3.83       | 3.87        | 3.23        | 2.60        |
| Spanish (Colombia)    | 2.57       | 5.40       | 5.03       | 3.79       | 4.44        | 2.89        | 2.58        |
| Spanish (Costa Rica)  | 2.87       | 5.31       | 4.99       | 3.83       | 4.41        | 2.24        | 2.39        |
| Spanish (Ecuador)     | 3.20       | 5.31       | 4.91       | 4.12       | 4.11        | 3.00        | 2.83        |
| Spanish (Spain)       | 2.58       | 5.53       | 5.02       | 3.40       | 4.31        | 3.17        | 2.96        |
| Spanish (Guatemala)   | 2.79       | 5.31       | 5.20       | 3.81       | 4.57        | 2.59        | 2.82        |
| Spanish (Uruguay)     | 4.01       | 5.63       | 4.77       | 3.83       | 4.18        | 2.90        | 2.87        |
| Spanish (Honduras)    | 3.27       | 5.08       | 4.81       | 4.18       | 4.29        | 3.17        | 2.94        |
| Estonian              | 3.75       | 5.06       | 4.95       | 3.79       | 4.23        | 2.90        | 2.39        |
| Finnish               | 3.20       | 5.62       | 5.30       | 4.56       | 4.11        | 3.68        | 2.87        |
| Italian               | 2.77       | 5.50       | 5.18       | 3.97       | 4.55        | 3.34        | 3.26        |
| Japanese              | 3.84       | 4.97       | 4.94       | 4.10       | 4.09        | 3.02        | 3.67        |
| Norwegian             | 3.56       | 5.98       | 4.23       | 3.65       | 3.77        | 3.18        | 3.32        |
| Portuguese (Portugal) | 2.97       | 5.72       | 4.79       | 3.70       | 4.77        | 2.89        | 2.49        |
| Portuguese (Brazil)   | 2.27       | 5.71       | 5.27       | 3.43       | 3.94        | 2.82        | 2.35        |
| Russian               | 4.00       | 5.01       | 4.59       | 4.18       | 4.49        | 3.05        | 3.35        |
| Slovak                | 3.27       | 5.31       | 5.08       | 3.85       | 4.20        | 3.21        | 3.24        |
| Swedish               | 2.34       | 5.89       | 5.17       | 2.36       | 4.13        | 3.38        | 3.85        |
| Turkish               | 3.16       | 5.08       | 4.97       | 3.78       | 4.80        | 3.12        | 2.19        |
| Ukrainian             | 4.03       | 5.19       | 5.11       | 4.05       | 3.71        | 4.70        | 3.00        |
| Chinese               | 2.71       | 5.23       | 5.14       | 4.26       | 4.23        | 3.20        | 3.06        |

**Table S10**

*Correlation between conspiratorial thinking and anti-expert sentiment with trust (before measurement alignment)*

---

|                                           | 1    | 2    | 3   | 4   | 5   | 6   | 7   | 8   |
|-------------------------------------------|------|------|-----|-----|-----|-----|-----|-----|
| 1. Conspiratorial Thinking                |      |      |     |     |     |     |     |     |
| 2. Anti-expert Sentiment                  | .44  |      |     |     |     |     |     |     |
| 3. Trust in parliament/government         | -.42 | -.17 |     |     |     |     |     |     |
| 4. Trust in police                        | -.38 | -.19 | .70 |     |     |     |     |     |
| 5. Trust in civil service                 | -.41 | -.22 | .74 | .75 |     |     |     |     |
| 6. Trust in health system                 | -.39 | -.29 | .56 | .66 | .69 |     |     |     |
| 7. Trust in the WHO                       | -.39 | -.34 | .42 | .37 | .47 | .49 |     |     |
| 8. Trust in governmental effort           | -.39 | -.19 | .79 | .61 | .68 | .56 | .46 |     |
| 9. Trust in scientific research community | -.43 | -.44 | .39 | .39 | .46 | .54 | .62 | .46 |

---
